# Supplementary material for: Study of the Antimicrobial Activity of Tilapia Piscidin 3 (TP3) and TP4 and Their Effects on Immune Functions in Hybrid Tilapia (Oreochromis spp.)
Source: PubMed Central journal article supplement (PMC5234776; doi:10.1371/journal.pone.0169678), 2017-01-13

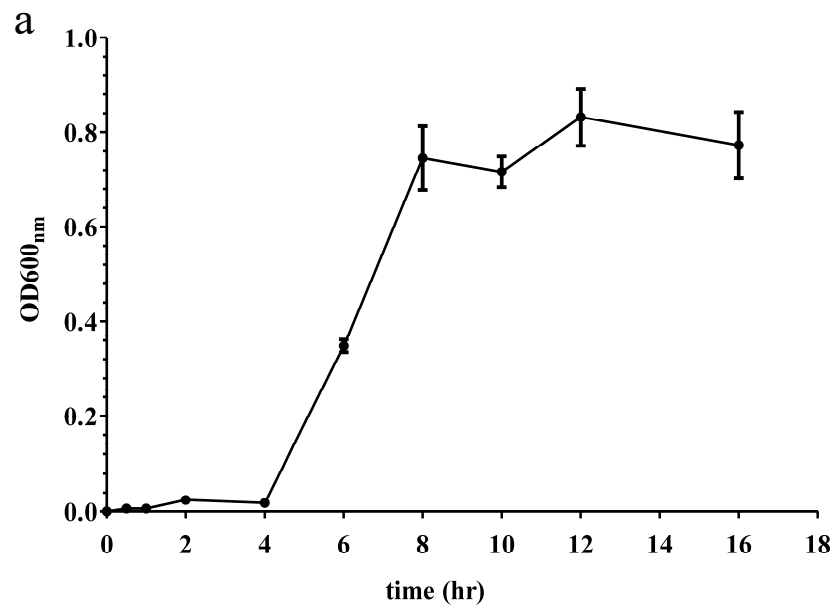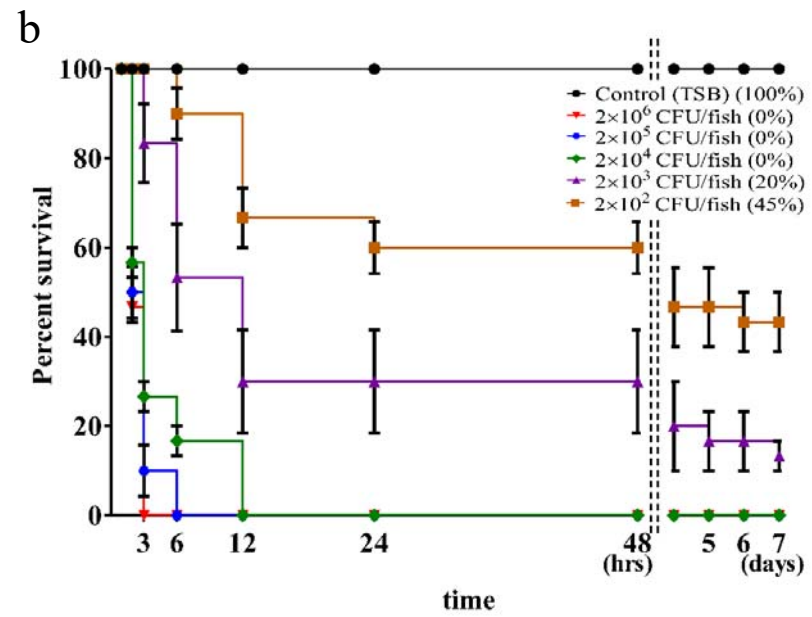

Supplement: pone.0169678.s001.pdf [file pone.0169678.s001.pdf]
