# Supplementary material for: Study of the Antimicrobial Activity of Tilapia Piscidin 3 (TP3) and TP4 and Their Effects on Immune Functions in Hybrid Tilapia (Oreochromis spp.)
Source: PubMed Central journal article supplement (PMC5234776; doi:10.1371/journal.pone.0169678), 2017-01-13

# (3a) TP3 treatment of liver

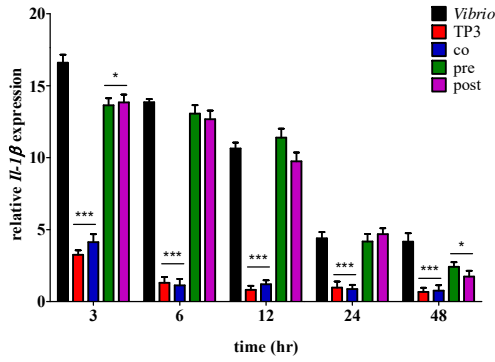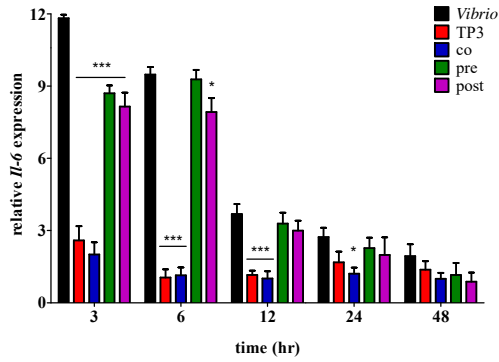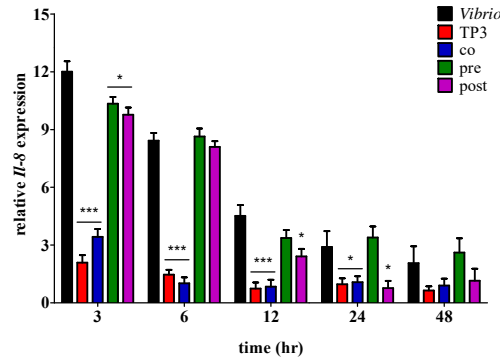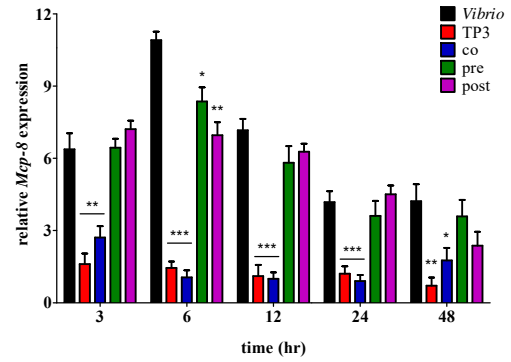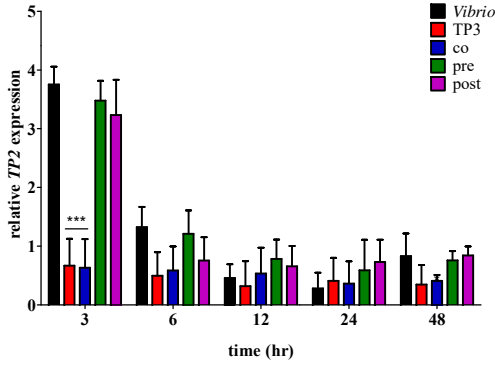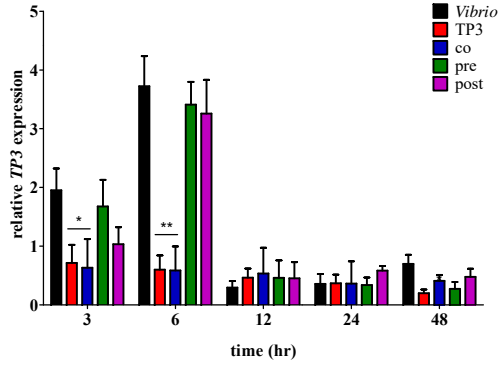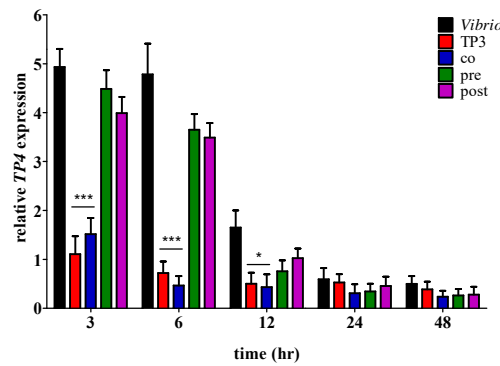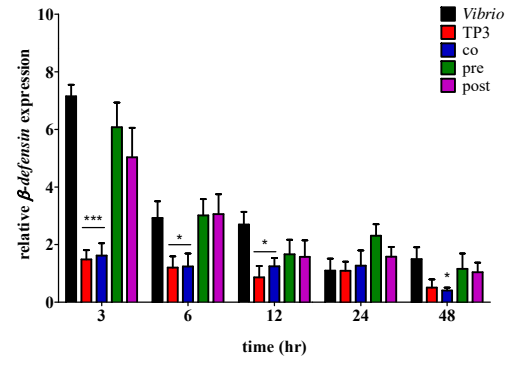

### (3b) TP3 treatment of spleen

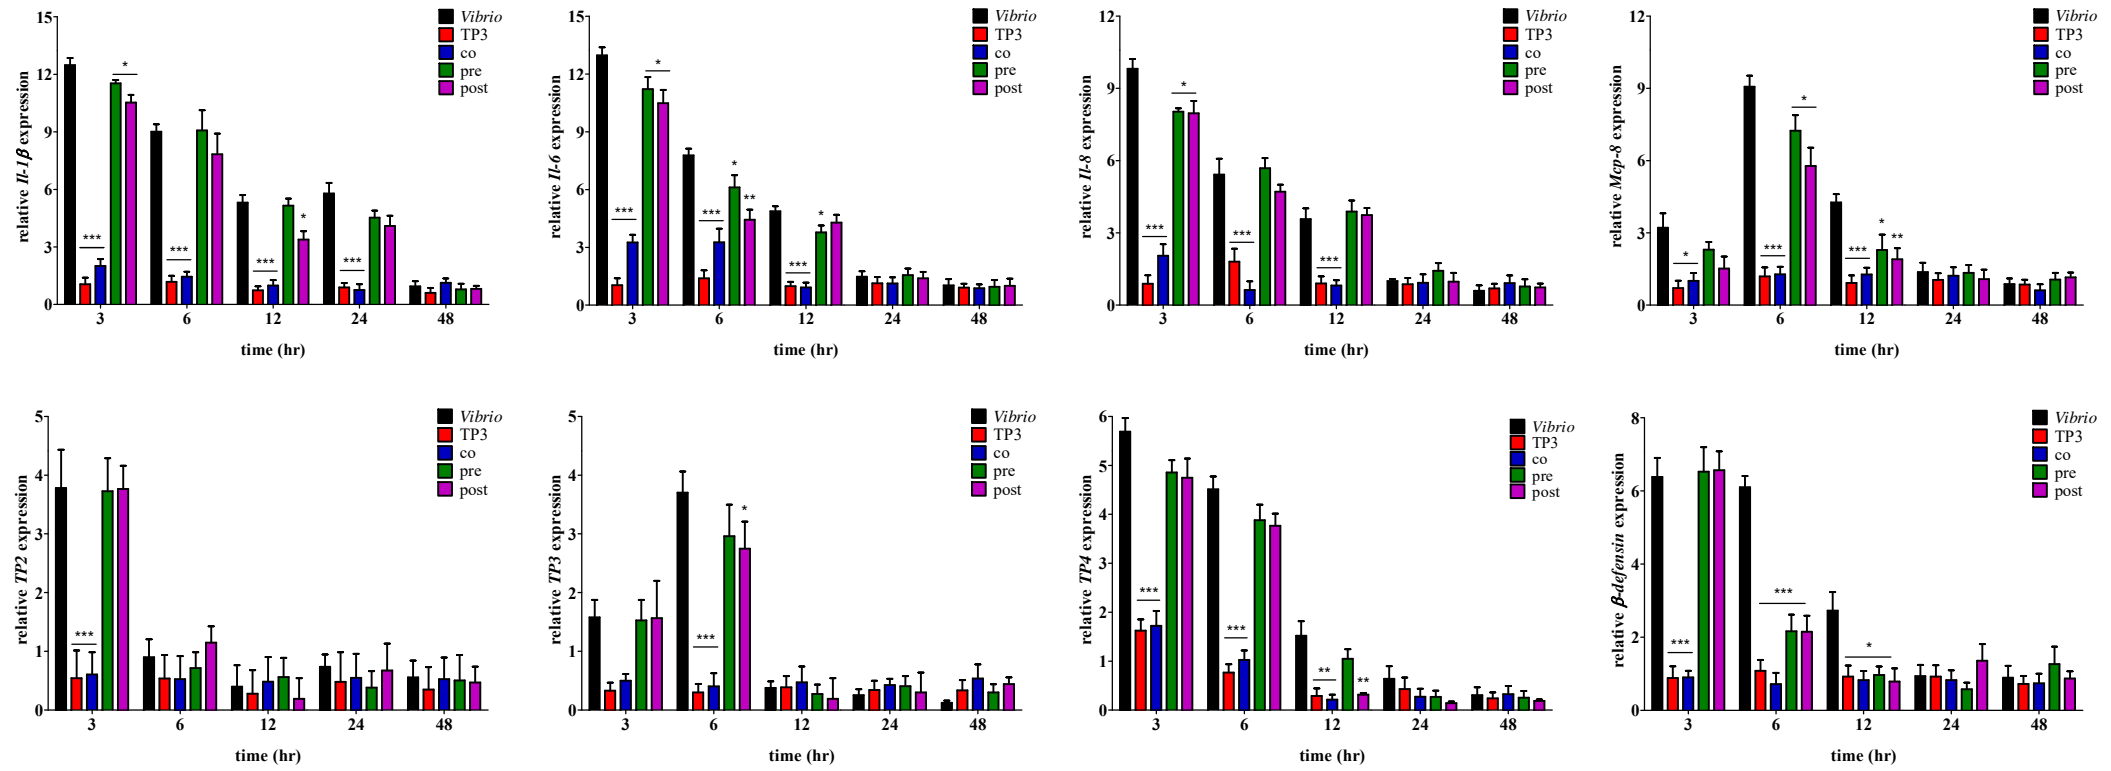

# (3c) TP4 treatment of liver

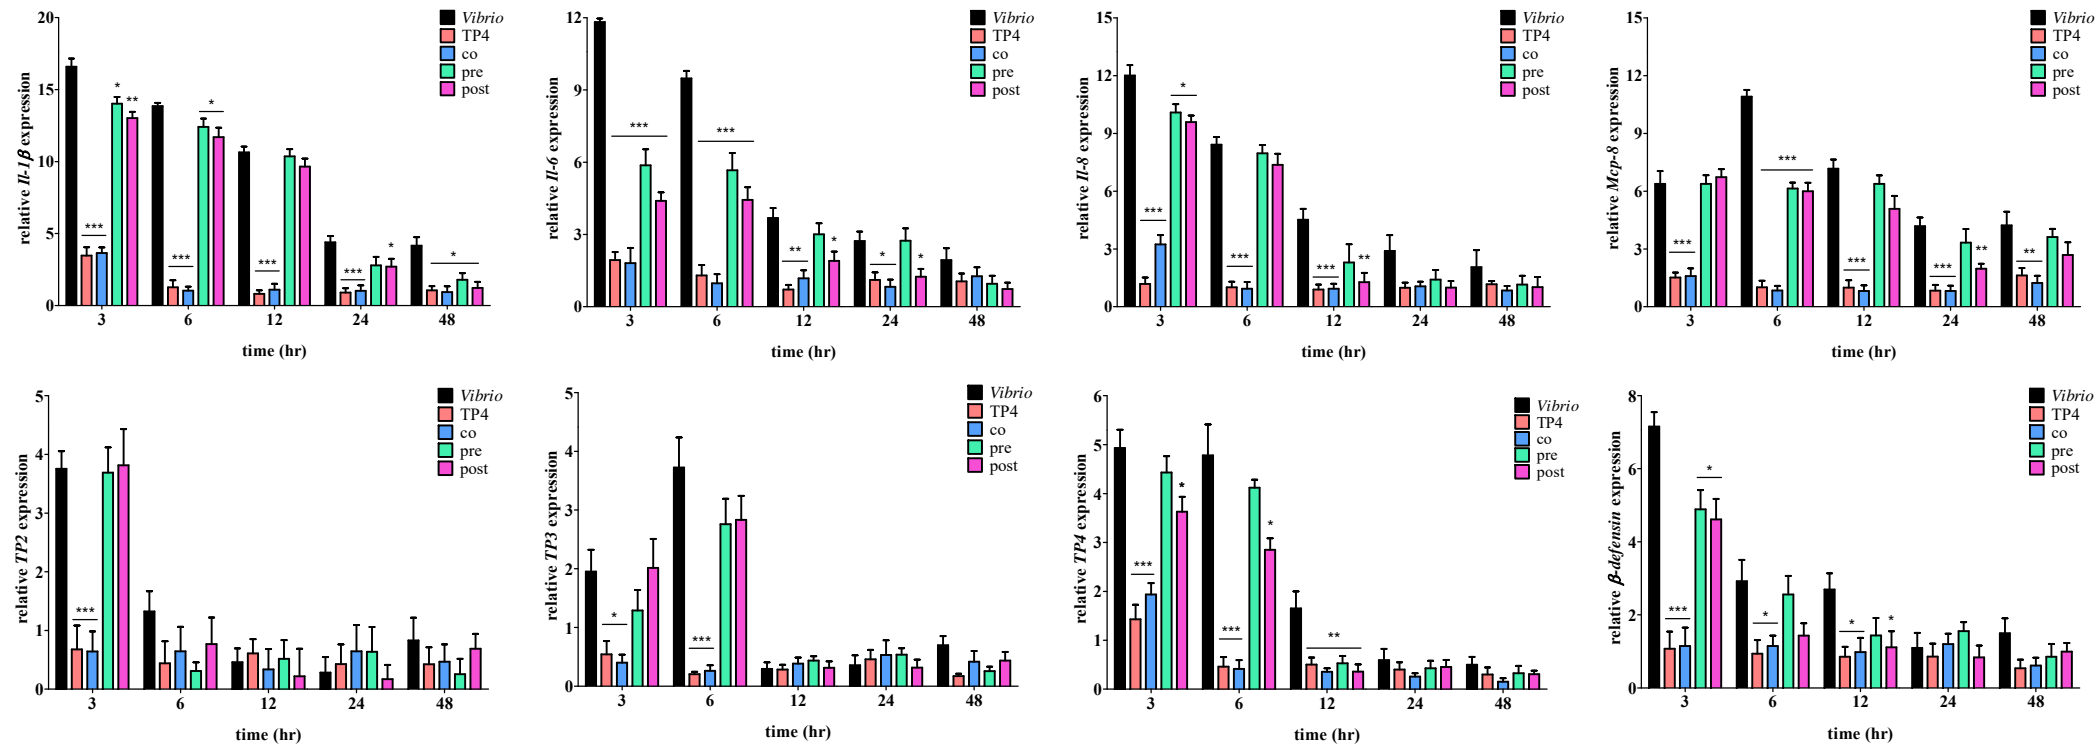

### (3d) TP4 treatment of spleen

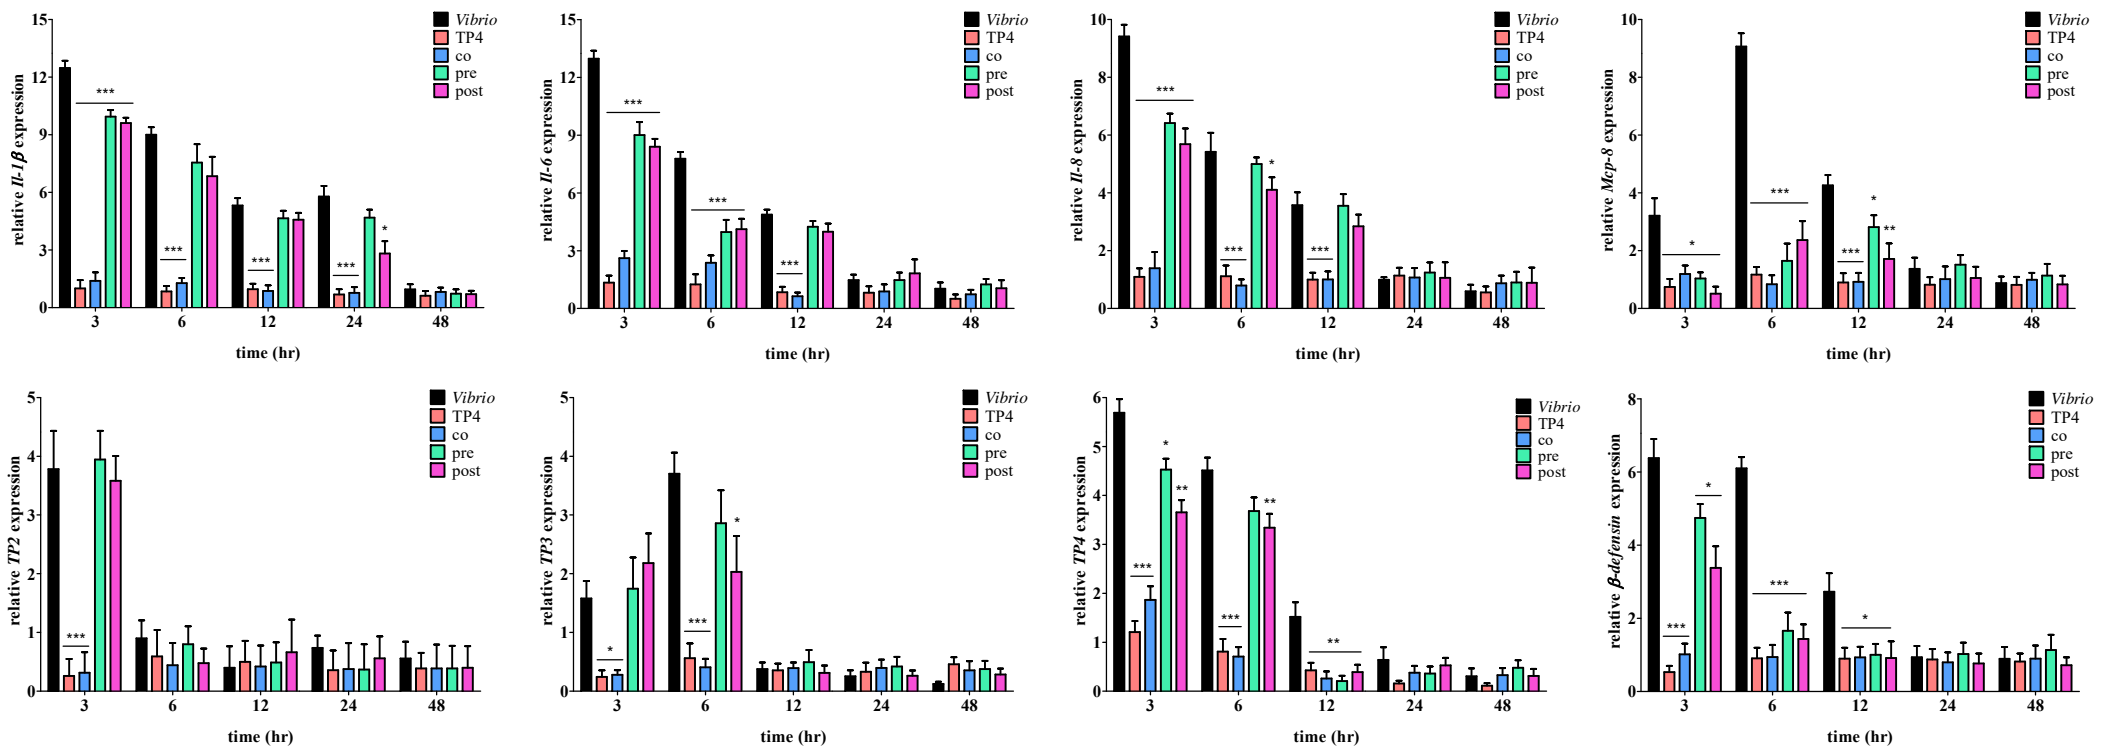

Supplement: pone.0169678.s003.pdf [file pone.0169678.s003.pdf]
